# Supplementary material for: Northern Richness, Southern Dead End—Origin and Dispersal Events of Pseudolycoriella (Sciaridae, Diptera) between New Zealand’s Main Islands
Source: MDPI journal article supplement (doi:10.3390/insects14060548), 2023-06-12
Supplement: s1 [file s1]

**Table S1.** Sequenced specimens of *Pseudolycoriella* spp. (Sciaridae, Diptera) from New Zealand and Tasmania with GenBank accession numbers. The type of utilisation is indicated in the last column (H, Haplotype network construction; \*B, \*BEAST analyses). The collections of the voucher material are indicated (CBGC, Centre for Biodiversity Genomics, Guelph, Canada; NZAC, New Zealand Arthropod Collection, Auckland, New Zealand [collection number is given in brackets]; PABM, Private Collection Adam Broadley, Melbourne, Australia; SDEI, Senckenberg German Entomological Institute, Müncheberg, Germany).

| Specimen number   | Species                          | Taxonomic assignment | Voucher deposition  | Island       | Locality                | Coordinates (lat./long.) | GenBank accession numbers |            |          |    |
|-------------------|----------------------------------|----------------------|---------------------|--------------|-------------------------|--------------------------|---------------------------|------------|----------|----|
|                   |                                  |                      |                     |              |                         |                          | COI                       | 16S        | 28S      |    |
| SDEI-Dipt-0000625 | <i>Pseudolycoriella aotearoa</i> | zealandica clade     | SDEI                | North Island | Tongariro National Park | -39.393/175.450          | OQ644691                  | OQ641704   | -        |    |
| SDEI-Dipt-0000758 | <i>Psl. aotearoa</i>             | zealandica clade     | SDEI                | North Island | Tongariro National Park | -39.393/175.450          | OQ569823                  | OQ581683   | -        | *B |
| SDEI-Dipt-0000978 | <i>Psl. aotearoa</i>             | zealandica clade     | SDEI                | North Island | Tongariro National Park | -39.393/175.450          | OQ644701                  | -          | -        |    |
| SDEI-Dipt-0000997 | <i>Psl. aotearoa</i>             | zealandica clade     | NZAC (NZAC02028892) | North Island | Tongariro National Park | -39.393/175.450          | MK906359                  | MK906451   | MK906541 | *B |
| SDEI-Dipt-0000999 | <i>Psl. aotearoa</i>             | zealandica clade     | SDEI                | North Island | Tongariro National Park | -39.393/175.450          | OQ569853                  | OQ581708   | -        | *B |
| SDEI-Dipt-0001000 | <i>Psl. aotearoa</i>             | zealandica clade     | NZAC (NZAC02029030) | North Island | Tongariro National Park | -39.393/175.450          | OQ644702                  | OQ641707   | -        |    |
| SDEI-Dipt-0001661 | <i>Psl. aotearoa</i>             | zealandica clade     | SDEI                | North Island | Tongariro National Park | -39.393/175.450          | OQ644768                  | OQ641745   | -        |    |
| SDEI-Dipt-0001662 | <i>Psl. aotearoa</i>             | zealandica clade     | SDEI                | North Island | Tongariro National Park | -39.393/175.450          | OQ644769                  | OQ641746   | -        |    |
| SDEI-Dipt-0001663 | <i>Psl. aotearoa</i>             | zealandica clade     | SDEI                | North Island | Tongariro National Park | -39.393/175.450          | OQ644770                  | OQ641747   | -        |    |
| SDEI-Dipt-0001665 | <i>Psl. aotearoa</i>             | zealandica clade     | SDEI                | North Island | Tongariro National Park | -39.393/175.450          | OQ644771                  | OQ641749   | -        |    |
| SDEI-Dipt-0001666 | <i>Psl. aotearoa</i>             | zealandica clade     | SDEI                | North Island | Tongariro National Park | -39.393/175.450          | OQ573675                  | OQ598657   | -        | *B |
| SDEI-Dipt-0001667 | <i>Psl. aotearoa</i>             | zealandica clade     | SDEI                | North Island | Tongariro National Park | -39.393/175.450          | OQ644772                  | OQ641750   | -        |    |
| SDEI-Dipt-0001671 | <i>Psl. aotearoa</i>             | zealandica clade     | SDEI                | North Island | Tongariro National Park | -39.393/175.450          | OQ644773                  | OQ641752   | -        |    |
| SDEI-Dipt-0000844 | <i>Psl. bispina</i>              | bispina clade        | SDEI                | North Island | Pureora Forest Park     | -38.5/175.583            | OQ569829                  | OQ581689   | -        | *B |
| SDEI-Dipt-0000946 | <i>Psl. bispina</i>              | bispina clade        | SDEI                | North Island | Tongariro National Park | -39.376/175.444          | MK906352                  | MK906444.2 | MK906534 | *B |

| Specimen number   | Species              | Taxonomic assignment      | Voucher deposition  | Island       | Locality                | Coordinates (lat./long.) | GenBank accession numbers |            |          |    |
|-------------------|----------------------|---------------------------|---------------------|--------------|-------------------------|--------------------------|---------------------------|------------|----------|----|
|                   |                      |                           |                     |              |                         |                          | COI                       | 16S        | 28S      |    |
| SDEI-Dipt-0000974 | <i>Psl. bispina</i>  | <i>bispina</i> clade      | NZAC (NZAC02029036) | North Island | Pureora Forest Park     | -38.5/175.583            | MK906355                  | MK906447   | MK906537 | *B |
| SDEI-Dipt-0000975 | <i>Psl. bispina</i>  | <i>bispina</i> clade      | NZAC (NZAC02029037) | North Island | Pureora Forest Park     | -38.5/175.583            | OQ644700                  | -          | -        |    |
| SDEI-Dipt-0001251 | <i>Psl. bispina</i>  | <i>bispina</i> clade      | SDEI                | North Island | Katikati                | -37.617/175.878          | MK906384                  | MK906479.2 | MK906569 | *B |
| SDEI-Dipt-0001517 | <i>Psl. bispina</i>  | <i>bispina</i> clade      | SDEI                | North Island | Pureora Forest Park     | -38.5/175.583            | OQ573627                  | OQ598613   | -        | *B |
| SDEI-Dipt-0001518 | <i>Psl. bispina</i>  | <i>bispina</i> clade      | SDEI                | North Island | Pureora Forest Park     | -38.5/175.583            | MK906399                  | MK906497.2 | MK906587 |    |
| SDEI-Dipt-0001522 | <i>Psl. bispina</i>  | <i>bispina</i> clade      | NZAC (NZAC02029034) | North Island | Tongariro National Park | -39.376/175.444          | MK906401                  | MK906499.2 | MK906589 |    |
| SDEI-Dipt-0001526 | <i>Psl. bispina</i>  | <i>bispina</i> clade      | NZAC (NZAC02029035) | North Island | Tongariro National Park | -39.376/175.444          | OQ644738                  | -          | -        |    |
| SDEI-Dipt-0001085 | <i>Psl. cavatica</i> | <i>Psl. bruckii</i> group | NZAC (NZAC02029041) | North Island | Katikati                | -37.566/175.895          | MK906405                  | MK906455   | MK906545 |    |
| SDEI-Dipt-0001297 | <i>Psl. cavatica</i> | <i>Psl. bruckii</i> group | SDEI                | North Island | Katikati                | -37.538/175.930          | OQ644717                  | OQ641715   | -        |    |
| SDEI-Dipt-0001298 | <i>Psl. cavatica</i> | <i>Psl. bruckii</i> group | NZAC (NZAC02029043) | North Island | Katikati                | -37.538/175.930          | OQ644718                  | OQ641716   | -        |    |
| SDEI-Dipt-0001368 | <i>Psl. cavatica</i> | <i>Psl. bruckii</i> group | SDEI                | North Island | Katikati                | -37.55/175.90            | OQ644726                  | OQ641722   | -        |    |
| SDEI-Dipt-0001377 | <i>Psl. cavatica</i> | <i>Psl. bruckii</i> group | SDEI                | North Island | Katikati                | -37.542/175.920          | OQ644727                  | OQ641723   | -        |    |
| SDEI-Dipt-0001411 | <i>Psl. cavatica</i> | <i>Psl. bruckii</i> group | SDEI                | North Island | Katikati                | -37.566/175.895          | MK906395                  | MK906490   | MK906580 |    |
| SDEI-Dipt-0001443 | <i>Psl. cavatica</i> | <i>Psl. bruckii</i> group | SDEI                | North Island | Katikati                | -37.566/175.895          | OQ644729                  | OQ641725   | -        |    |
| SDEI-Dipt-0001458 | <i>Psl. cavatica</i> | <i>Psl. bruckii</i> group | SDEI                | North Island | Katikati                | -37.566/175.895          | OQ644730                  | OQ641726   | -        |    |
| SDEI-Dipt-0000628 | <i>Psl. dagae</i>    | <i>jejuna</i> clade       | SDEI                | North Island | Katikati                | -37.617/175.878          | MK906330                  | MK906421   | MK906511 |    |
| SDEI-Dipt-0000655 | <i>Psl. dagae</i>    | <i>jejuna</i> clade       | SDEI                | North Island | Katikati                | -37.617/175.878          | MK906331                  | MK906422   | MK906512 | *B |
| SDEI-Dipt-0000679 | <i>Psl. dagae</i>    | <i>jejuna</i> clade       | NZAC (NZAC02028885) | North Island | Katikati                | -37.617/175.878          | OQ569820                  | OQ581682   | -        | *B |

| Specimen number   | Species                       | Taxonomic assignment               | Voucher deposition  | Island       | Locality                | Coordinates (lat./long.) | GenBank accession numbers |            |             |
|-------------------|-------------------------------|------------------------------------|---------------------|--------------|-------------------------|--------------------------|---------------------------|------------|-------------|
|                   |                               |                                    |                     |              |                         |                          | COI                       | 16S        | 28S         |
| SDEI-Dipt-0001249 | <i>Psl. dagae</i>             | <i>jejuna</i> clade                | NZAC (NZAC02028898) | North Island | Katikati                | -37.617/175.878          | OQ644716                  | OQ641714   | -           |
| SDEI-Dipt-0001367 | <i>Psl. dagae</i>             | <i>jejuna</i> clade                | NZAC (NZAC02028899) | North Island | Katikati                | -37.55/175.90            | OQ644725                  | OQ641721   | -           |
| SDEI-Dipt-0000568 | <i>Psl. frederickedwardsi</i> | <i>macrotegmenta</i> s. str. clade | NZAC (NZAC02028903) | North Island | Pureora Forest          | -38.5/175.583            | OQ569816                  | -          | - *B        |
| SDEI-Dipt-0000756 | <i>Psl. frederickedwardsi</i> | <i>macrotegmenta</i> s. str. clade | SDEI                | North Island | Tongariro National Park | -39.393/175.450          | MK906339                  | MK906431.2 | MK906521.2  |
| SDEI-Dipt-0000772 | <i>Psl. frederickedwardsi</i> | <i>macrotegmenta</i> s. str. clade | SDEI                | North Island | Tongariro National Park | -39.376/175.444          | MK906341                  | MK906433   | MK906523 *B |
| SDEI-Dipt-0000823 | <i>Psl. frederickedwardsi</i> | <i>macrotegmenta</i> s. str. clade | SDEI                | North Island | Pureora Forest Park     | -38.5/175.583            | OQ569828                  | OQ581688   | - *B        |
| SDEI-Dipt-0000945 | <i>Psl. frederickedwardsi</i> | <i>macrotegmenta</i> s. str. clade | NZAC (NZAC02028906) | North Island | Tongariro National Park | -39.376/175.444          | OQ644697                  | -          | -           |
| SDEI-Dipt-0000947 | <i>Psl. frederickedwardsi</i> | <i>macrotegmenta</i> s. str. clade | NZAC (NZAC02028907) | North Island | Tongariro National Park | -39.376/175.444          | OQ644698                  | -          | -           |
| SDEI-Dipt-0001224 | <i>Psl. frederickedwardsi</i> | <i>macrotegmenta</i> s. str. clade | NZAC (NZAC02028905) | North Island | Tongariro National Park | -39.393/175.450          | MK906374                  | MK906468   | MK906558 *B |
| SDEI-Dipt-0001237 | <i>Psl. frederickedwardsi</i> | <i>macrotegmenta</i> s. str. clade | SDEI                | North Island | Tongariro National Park | -39.393/175.450          | MK906379                  | MK906474   | MK906564    |
| SDEI-Dipt-0001247 | <i>Psl. frederickedwardsi</i> | <i>macrotegmenta</i> s. str. clade | SDEI                | North Island | Tongariro National Park | -39.393/175.450          | MK906382                  | MK906477.2 | MK906567    |
| SDEI-Dipt-0001507 | <i>Psl. frederickedwardsi</i> | <i>macrotegmenta</i> s. str. clade | NZAC (NZAC02028902) | North Island | Pureora Forest          | -38.5/175.583            | OQ644732                  | -          | -           |
| SDEI-Dipt-0001508 | <i>Psl. frederickedwardsi</i> | <i>macrotegmenta</i> s. str. clade | SDEI                | North Island | Pureora Forest          | -38.5/175.583            | OQ573625                  | OQ598611   | - *B        |
| SDEI-Dipt-0001509 | <i>Psl. frederickedwardsi</i> | <i>macrotegmenta</i> s. str. clade | SDEI                | North Island | Pureora Forest          | -38.5/175.583            | OQ644733                  | -          | -           |
| SDEI-Dipt-0001510 | <i>Psl. frederickedwardsi</i> | <i>macrotegmenta</i> s. str. clade | SDEI                | North Island | Pureora Forest          | -38.5/175.583            | OQ644734                  | -          | -           |
| SDEI-Dipt-0001530 | <i>Psl. frederickedwardsi</i> | <i>macrotegmenta</i> s. str. clade | NZAC (NZAC02028908) | North Island | Tongariro National Park | -39.376/175.444          | OQ573630                  | OQ598616   | - *B        |
| SDEI-Dipt-0001531 | <i>Psl. frederickedwardsi</i> | <i>macrotegmenta</i> s. str. clade | SDEI                | North Island | Tongariro National Park | -39.376/175.444          | OQ644740                  | OQ641730   | -           |

| Specimen number   | Species                       | Taxonomic assignment               | Voucher deposition  | Island       | Locality                | Coordinates (lat./long.) | GenBank accession numbers |          |      |
|-------------------|-------------------------------|------------------------------------|---------------------|--------------|-------------------------|--------------------------|---------------------------|----------|------|
|                   |                               |                                    |                     |              |                         |                          | COI                       | 16S      | 28S  |
| SDEI-Dipt-0001535 | <i>Psl. frederickedwardsi</i> | <i>macrotegmenta</i> s. str. clade | SDEI                | North Island | Tongariro National Park | -39.376/175.444          | OQ644742                  | OQ641732 | -    |
| SDEI-Dipt-0001537 | <i>Psl. frederickedwardsi</i> | <i>macrotegmenta</i> s. str. clade | NZAC (NZAC02028904) | North Island | Tongariro National Park | -39.393/175.450          | OQ573633                  | OQ598618 | - *B |
| SDEI-Dipt-0001603 | <i>Psl. frederickedwardsi</i> | <i>macrotegmenta</i> s. str. clade | SDEI                | North Island | Tongariro National Park | -39.393/175.450          | OQ644744                  | OQ641733 | -    |
| SDEI-Dipt-0001605 | <i>Psl. frederickedwardsi</i> | <i>macrotegmenta</i> s. str. clade | SDEI                | North Island | Tongariro National Park | -39.393/175.450          | OQ644745                  | OQ641734 | -    |
| SDEI-Dipt-0001606 | <i>Psl. frederickedwardsi</i> | <i>macrotegmenta</i> s. str. clade | SDEI                | North Island | Tongariro National Park | -39.393/175.450          | OQ644746                  | OQ641735 | -    |
| SDEI-Dipt-0001607 | <i>Psl. frederickedwardsi</i> | <i>macrotegmenta</i> s. str. clade | SDEI                | North Island | Tongariro National Park | -39.393/175.450          | OQ644747                  | OQ641736 | -    |
| SDEI-Dipt-0001608 | <i>Psl. frederickedwardsi</i> | <i>macrotegmenta</i> s. str. clade | SDEI                | North Island | Tongariro National Park | -39.393/175.450          | OQ573671                  | OQ598655 | - *B |
| SDEI-Dipt-0001609 | <i>Psl. frederickedwardsi</i> | <i>macrotegmenta</i> s. str. clade | SDEI                | North Island | Tongariro National Park | -39.393/175.450          | OQ644748                  | -        | -    |
| SDEI-Dipt-0001610 | <i>Psl. frederickedwardsi</i> | <i>macrotegmenta</i> s. str. clade | SDEI                | North Island | Pureora Forest          | -38.5/175.583            | OQ573672                  | -        | - *B |
| SDEI-Dipt-0001611 | <i>Psl. frederickedwardsi</i> | <i>macrotegmenta</i> s. str. clade | SDEI                | North Island | Pureora Forest          | -38.5/175.583            | OQ644749                  | -        | -    |
| SDEI-Dipt-0001612 | <i>Psl. frederickedwardsi</i> | <i>macrotegmenta</i> s. str. clade | SDEI                | North Island | Pureora Forest          | -38.5/175.583            | OQ644750                  | -        | -    |
| SDEI-Dipt-0001614 | <i>Psl. frederickedwardsi</i> | <i>macrotegmenta</i> s. str. clade | SDEI                | North Island | Pureora Forest          | -38.5/175.583            | OQ644751                  | -        | -    |
| SDEI-Dipt-0001616 | <i>Psl. frederickedwardsi</i> | <i>macrotegmenta</i> s. str. clade | SDEI                | North Island | Pureora Forest          | -38.5/175.583            | OQ644752                  | -        | -    |
| SDEI-Dipt-0001620 | <i>Psl. frederickedwardsi</i> | <i>macrotegmenta</i> s. str. clade | SDEI                | North Island | Pureora Forest Park     | -38.5/175.583            | OQ644753                  | OQ641737 | -    |
| SDEI-Dipt-0001621 | <i>Psl. frederickedwardsi</i> | <i>macrotegmenta</i> s. str. clade | SDEI                | North Island | Pureora Forest Park     | -38.5/175.583            | OQ644754                  | OQ641738 | -    |
| SDEI-Dipt-0001655 | <i>Psl. frederickedwardsi</i> | <i>macrotegmenta</i> s. str. clade | SDEI                | North Island | Pureora Forest          | -38.5/175.583            | OQ644763                  | -        | -    |
| SDEI-Dipt-0001656 | <i>Psl. frederickedwardsi</i> | <i>macrotegmenta</i> s. str. clade | SDEI                | North Island | Pureora Forest          | -38.5/175.583            | OQ644764                  | -        | -    |

| Specimen number   | Species                       | Taxonomic assignment               | Voucher deposition  | Island       | Locality                | Coordinates (lat./long.) | GenBank accession numbers |            |               |
|-------------------|-------------------------------|------------------------------------|---------------------|--------------|-------------------------|--------------------------|---------------------------|------------|---------------|
|                   |                               |                                    |                     |              |                         |                          | COI                       | 16S        | 28S           |
| SDEI-Dipt-0001657 | <i>Psl. frederickedwardsi</i> | <i>macrotegmenta</i> s. str. clade | SDEI                | North Island | Pureora Forest          | -38.5/175.583            | OQ644765                  | -          | -             |
| SDEI-Dipt-0001658 | <i>Psl. frederickedwardsi</i> | <i>macrotegmenta</i> s. str. clade | SDEI                | North Island | Pureora Forest          | -38.5/175.583            | OQ644766                  | -          | -             |
| SDEI-Dipt-0001659 | <i>Psl. frederickedwardsi</i> | <i>macrotegmenta</i> s. str. clade | SDEI                | North Island | Pureora Forest          | -38.5/175.583            | OQ644767                  | -          | -             |
| SDEI-Dipt-0000977 | <i>Psl. gonotegmenta</i>      | <i>macrotegmenta</i> s. str. clade | NZAC (NZAC02028912) | South Island | Maruia Springs          | -42.382/172.262          | MK906356                  | MK906448.2 | - *B          |
| SDEI-Dipt-0000984 | <i>Psl. gonotegmenta</i>      | <i>macrotegmenta</i> s. str. clade | SDEI                | South Island | Maruia Springs          | -42.382/172.262          | OQ569851                  | -          | - *B          |
| SDEI-Dipt-0001495 | <i>Psl. gonotegmenta</i>      | <i>macrotegmenta</i> s. str. clade | NZAC (NZAC02028882) | South Island | Rahu Scenic Reserve     | -42.273/171.980          | OQ644731                  | OQ641727   | MK906538 *B   |
| SDEI-Dipt-0000506 | <i>Psl. hauta</i>             | <i>jejuna</i> clade                | SDEI                | South Island | Catlins                 | -46.541/169.608          | MK906322                  | MK906412   | MK906502.3 *B |
| SDEI-Dipt-0001134 | <i>Psl. hauta</i>             | <i>jejuna</i> clade                | NZAC (NZAC02028878) | South Island | Catlins                 | -46.541/169.608          | OQ644706                  | -          | -             |
| SDEI-Dipt-0001137 | <i>Psl. hauta</i>             | <i>jejuna</i> clade                | NZAC (NZAC02028913) | South Island | Catlins                 | -46.541/169.608          | OQ644708                  | OQ641710   | -             |
| SDEI-Dipt-0001142 | <i>Psl. hauta</i>             | <i>jejuna</i> clade                | SDEI                | South Island | Catlins                 | -46.541/169.608          | OQ644709                  | OQ641711   | -             |
| SDEI-Dipt-0000621 | <i>Psl. huttoni</i>           | <i>macrotegmenta</i> s. str. clade | NZAC (NZAC02028891) | North Island | Tongariro National Park | -39.393/175.450          | MK906327                  | MK906418   | MK906508 *B   |
| SDEI-Dipt-0000892 | <i>Psl. jaschhofi</i>         | <i>macrotegmenta</i> s. l. clade   | SDEI                | South Island | Fiordland National Park | -44.686/167.964          | OQ644696                  | OQ641706   | -             |
| SDEI-Dipt-0000896 | <i>Psl. jaschhofi</i>         | <i>macrotegmenta</i> s. l. clade   | SDEI                | South Island | Fiordland National Park | -44.686/167.964          | OQ569837                  | OQ581694   | - *B          |
| SDEI-Dipt-0000962 | <i>Psl. jaschhofi</i>         | <i>macrotegmenta</i> s. l. clade   | SDEI                | South Island | Fiordland National Park | -45.000/168.010          | OQ644699                  | -          | -             |
| SDEI-Dipt-0001036 | <i>Psl. jaschhofi</i>         | <i>macrotegmenta</i> s. l. clade   | NZAC (NZAC02028923) | South Island | Lewis Pass              | -42.38/172.4             | OQ644703                  | -          | -             |
| SDEI-Dipt-0001198 | <i>Psl. jaschhofi</i>         | <i>macrotegmenta</i> s. l. clade   | SDEI                | South Island | Lewis Pass              | -42.38/172.4             | OQ644710                  | -          | -             |
| SDEI-Dipt-0001199 | <i>Psl. jaschhofi</i>         | <i>macrotegmenta</i> s. l. clade   | NZAC (NZAC02028889) | South Island | Lewis Pass              | -42.38/172.4             | OQ644711                  | -          | -             |

| Specimen number   | Species               | Taxonomic assignment                | Voucher deposition     | Island       | Locality                | Coordinates (lat./long.) | GenBank accession numbers |          |             |
|-------------------|-----------------------|-------------------------------------|------------------------|--------------|-------------------------|--------------------------|---------------------------|----------|-------------|
|                   |                       |                                     |                        |              |                         |                          | COI                       | 16S      | 28S         |
| SDEI-Dipt-0001203 | <i>Psl. jaschhofi</i> | <i>macrotegmenta</i><br>s. l. clade | SDEI                   | South Island | Lewis Pass              | -42.38/172.4             | OQ644712                  | OQ641712 | -           |
| SDEI-Dipt-0001207 | <i>Psl. jaschhofi</i> | <i>macrotegmenta</i><br>s. l. clade | NZAC<br>(NZAC02028929) | South Island | Lewis Pass              | -42.38/172.4             | OQ644713                  | -        | -           |
| SDEI-Dipt-0001209 | <i>Psl. jaschhofi</i> | <i>macrotegmenta</i><br>s. l. clade | NZAC<br>(NZAC02028932) | South Island | Lewis Pass              | -42.38/172.4             | OQ573610                  | OQ598596 | - *B        |
| SDEI-Dipt-0001210 | <i>Psl. jaschhofi</i> | <i>macrotegmenta</i><br>s. l. clade | NZAC<br>(NZAC02028931) | South Island | Lewis Pass              | -42.38/172.4             | OQ644714                  | OQ641713 | -           |
| SDEI-Dipt-0001217 | <i>Psl. jaschhofi</i> | <i>macrotegmenta</i><br>s. l. clade | SDEI                   | South Island | Lewis Pass              | -42.38/172.4             | OQ644715                  | -        | -           |
| SDEI-Dipt-0001332 | <i>Psl. jaschhofi</i> | <i>macrotegmenta</i><br>s. l. clade | NZAC<br>(NZAC02028928) | South Island | Fiordland National Park | -44.686/167.964          | OQ644719                  | OQ641717 | -           |
| SDEI-Dipt-0001341 | <i>Psl. jaschhofi</i> | <i>macrotegmenta</i><br>s. l. clade | NZAC<br>(NZAC02028927) | South Island | Fiordland National Park | -44.686/167.964          | OQ644720                  | OQ641718 | -           |
| SDEI-Dipt-0001342 | <i>Psl. jaschhofi</i> | <i>macrotegmenta</i><br>s. l. clade | NZAC<br>(NZAC02028930) | South Island | Fiordland National Park | -44.686/167.964          | OQ644721                  | -        | -           |
| SDEI-Dipt-0001343 | <i>Psl. jaschhofi</i> | <i>macrotegmenta</i><br>s. l. clade | NZAC<br>(NZAC02028924) | South Island | Fiordland National Park | -44.699/168.108          | OQ644722                  | OQ641719 | -           |
| SDEI-Dipt-0001344 | <i>Psl. jaschhofi</i> | <i>macrotegmenta</i><br>s. l. clade | SDEI                   | South Island | Fiordland National Park | -44.699/168.108          | OQ644723                  | OQ641720 | -           |
| SDEI-Dipt-0001345 | <i>Psl. jaschhofi</i> | <i>macrotegmenta</i><br>s. l. clade | NZAC<br>(NZAC02028925) | South Island | Fiordland National Park | -44.699/168.108          | OQ644724                  | -        | -           |
| SDEI-Dipt-0001511 | <i>Psl. jaschhofi</i> | <i>macrotegmenta</i><br>s. l. clade | SDEI                   | South Island | Fiordland National Park | -44.699/168.108          | MK906409                  | MK906494 | MK906584 *B |
| SDEI-Dipt-0001512 | <i>Psl. jaschhofi</i> | <i>macrotegmenta</i><br>s. l. clade | NZAC<br>(NZAC02028933) | South Island | Fiordland National Park | -44.699/168.108          | OQ644735                  | OQ641728 | -           |
| SDEI-Dipt-0001513 | <i>Psl. jaschhofi</i> | <i>macrotegmenta</i><br>s. l. clade | NZAC<br>(NZAC02028926) | South Island | Fiordland National Park | -44.699/168.108          | MK906410                  | MK906495 | MK906585    |
| SDEI-Dipt-0001514 | <i>Psl. jaschhofi</i> | <i>macrotegmenta</i><br>s. l. clade | SDEI                   | South Island | Fiordland National Park | -44.699/168.108          | MK906398                  | MK906496 | MK906586    |
| SDEI-Dipt-0001515 | <i>Psl. jaschhofi</i> | <i>macrotegmenta</i><br>s. l. clade | SDEI                   | South Island | Fiordland National Park | -44.699/168.108          | OQ573626                  | OQ598612 | - *B        |
| SDEI-Dipt-0001643 | <i>Psl. jaschhofi</i> | <i>macrotegmenta</i><br>s. l. clade | SDEI                   | South Island | Fiordland National Park | -44.699/168.108          | OQ573673                  | OQ598656 | - *B        |

| Specimen number   | Species               | Taxonomic assignment             | Voucher deposition  | Island       | Locality                | Coordinates (lat./long.) | GenBank accession numbers |            |            |    |
|-------------------|-----------------------|----------------------------------|---------------------|--------------|-------------------------|--------------------------|---------------------------|------------|------------|----|
|                   |                       |                                  |                     |              |                         |                          | COI                       | 16S        | 28S        |    |
| SDEI-Dipt-0001644 | <i>Psl. jaschhofi</i> | <i>macrotegmenta</i> s. l. clade | SDEI                | South Island | Fiordland National Park | -44.699/168.108          | OQ644755                  | OQ641739   | -          |    |
| SDEI-Dipt-0001646 | <i>Psl. jaschhofi</i> | <i>macrotegmenta</i> s. l. clade | SDEI                | South Island | Fiordland National Park | -44.699/168.108          | OQ644756                  | OQ641740   | -          |    |
| SDEI-Dipt-0001648 | <i>Psl. jaschhofi</i> | <i>macrotegmenta</i> s. l. clade | SDEI                | South Island | Fiordland National Park | -44.699/168.108          | OQ644757                  | OQ641741   | -          |    |
| SDEI-Dipt-0001649 | <i>Psl. jaschhofi</i> | <i>macrotegmenta</i> s. l. clade | SDEI                | South Island | Fiordland National Park | -44.699/168.108          | OQ644758                  | OQ641742   | -          |    |
| SDEI-Dipt-0001650 | <i>Psl. jaschhofi</i> | <i>macrotegmenta</i> s. l. clade | SDEI                | South Island | Fiordland National Park | -44.699/168.108          | OQ644759                  | OQ641743   | -          |    |
| SDEI-Dipt-0001651 | <i>Psl. jaschhofi</i> | <i>macrotegmenta</i> s. l. clade | SDEI                | South Island | Fiordland National Park | -44.699/168.108          | OQ644760                  | OQ641744   | -          |    |
| SDEI-Dipt-0001652 | <i>Psl. jaschhofi</i> | <i>macrotegmenta</i> s. l. clade | SDEI                | South Island | Fiordland National Park | -44.699/168.108          | OQ644761                  | -          | -          |    |
| SDEI-Dipt-0001654 | <i>Psl. jaschhofi</i> | <i>macrotegmenta</i> s. l. clade | SDEI                | South Island | Fiordland National Park | -44.699/168.108          | OQ644762                  | -          | -          |    |
| SDEI-Dipt-0000579 | <i>Psl. jejuna</i>    | <i>jejuna</i> clade              | SDEI                | North Island | Pureora Forest          | -38.5/175.583            | OQ644689                  | -          | -          |    |
| SDEI-Dipt-0000583 | <i>Psl. jejuna</i>    | <i>jejuna</i> clade              | SDEI                | North Island | Pureora Forest          | -38.5/175.583            | -                         | -          | OQ640201   |    |
| SDEI-Dipt-0000588 | <i>Psl. jejuna</i>    | <i>jejuna</i> clade              | SDEI                | North Island | Pureora Forest          | -38.5/175.583            | OQ644690                  | -          | -          |    |
| SDEI-Dipt-0000603 | <i>Psl. jejuna</i>    | <i>jejuna</i> clade              | SDEI                | North Island | Tongariro National Park | -39.393/175.450          | MK906326                  | MK906416   | MK906506   |    |
| SDEI-Dipt-0000617 | <i>Psl. jejuna</i>    | <i>jejuna</i> clade              | SDEI                | North Island | Tongariro National Park | -39.393/175.450          | MK906403.2                | MK906417.2 | MK906507   | *B |
| SDEI-Dipt-0000744 | <i>Psl. jejuna</i>    | <i>jejuna</i> clade              | NZAC (NZAC02028937) | North Island | Tongariro National Park | -39.393/175.450          | MK906404.2                | MK906428.2 | MK906518   |    |
| SDEI-Dipt-0000773 | <i>Psl. jejuna</i>    | <i>jejuna</i> clade              | NZAC (NZAC02028936) | North Island | Tongariro National Park | -39.376/175.444          | MK906342                  | MK906434.2 | MK906524   | *B |
| SDEI-Dipt-0000829 | <i>Psl. jejuna</i>    | <i>jejuna</i> clade              | SDEI                | North Island | Tongariro National Park | -39.376/175.444          | MK906344                  | MK906436.2 | MK906526.2 | *B |
| SDEI-Dipt-0001193 | <i>Psl. jejuna</i>    | <i>jejuna</i> clade              | SDEI                | North Island | Tongariro National Park | -39.393/175.450          | MK906371                  | MK906464.2 | MK906554   |    |

| Specimen number   | Species                   | Taxonomic assignment               | Voucher deposition  | Island       | Locality                       | Coordinates (lat./long.) | GenBank accession numbers |            |            |    |
|-------------------|---------------------------|------------------------------------|---------------------|--------------|--------------------------------|--------------------------|---------------------------|------------|------------|----|
|                   |                           |                                    |                     |              |                                |                          | COI                       | 16S        | 28S        |    |
| SDEI-Dipt-0001195 | <i>Psl. jejuna</i>        | <i>jejuna</i> clade                | NZAC (NZAC02028935) | North Island | Tongariro National Park        | -39.393/175.450          | MK906406                  | MK906466.2 | MK906556   | *B |
| SDEI-Dipt-0001339 | <i>Psl. jejuna</i>        | <i>jejuna</i> clade                | SDEI                | North Island | Tongariro National Park        | -39.393/175.450          | MK906390                  | MK906485   | MK906575   | *B |
| SDEI-Dipt-0001347 | <i>Psl. jejuna</i>        | <i>jejuna</i> clade                | NZAC (NZAC02028934) | North Island | Tongariro National Park        | -39.393/175.450          | MK906391                  | MK906486.2 | MK906576   | *B |
| SDEI-Dipt-0000880 | <i>Psl. jejunella</i>     | <i>jejuna</i> clade                | NZAC (NZAC02028876) | South Island | Fiordland National Park        | -44.699/168.108          | OQ644695                  | OQ641705   | -          |    |
| SDEI-Dipt-0000935 | <i>Psl. jejunella</i>     | <i>jejuna</i> clade                | SDEI                | South Island | Fiordland National Park        | -44.699/168.108          | MK906351                  | MK906443   | MK906533.2 | *B |
| SDEI-Dipt-0000500 | <i>Psl. kaikoura</i>      | <i>bispina</i> clade               | NZAC (NZAC02028890) | South Island | Waiaiu, Pillona                | -42.656/173.041          | MK906321                  | MK906411   | MK906501   | *B |
| SDEI-Dipt-0000615 | <i>Psl. macrotegmenta</i> | <i>macrotegmenta</i> s. str. clade | SDEI                | South Island | Ahaura, Granville State Forest | -42.351/171.542          | OQ569818                  | -          | -          | *B |
| SDEI-Dipt-0000757 | <i>Psl. macrotegmenta</i> | <i>macrotegmenta</i> s. str. clade | SDEI                | North Island | Tongariro National Park        | -39.393/175.450          | MK906340                  | MK906432   | MK906522   | *B |
| SDEI-Dipt-0000859 | <i>Psl. macrotegmenta</i> | <i>macrotegmenta</i> s. str. clade | SDEI                | North Island | Tongariro National Park        | -39.376/175.444          | OQ644694                  | -          | -          |    |
| SDEI-Dipt-0000627 | <i>Psl. maddisoni</i>     | <i>jejuna</i> clade                | NZAC (NZAC02028883) | North Island | Katikati                       | -37.617/175.878          | MK906329                  | MK906420   | MK906510   |    |
| SDEI-Dipt-0000664 | <i>Psl. maddisoni</i>     | <i>jejuna</i> clade                | SDEI                | North Island | Katikati                       | -37.55/175.90            | MK906332                  | MK906423   | MK906513   | *B |
| SDEI-Dipt-0001369 | <i>Psl. maddisoni</i>     | <i>jejuna</i> clade                | SDEI                | North Island | Katikati                       | -37.55/175.90            | OQ573618                  | OQ598604   | -          | *B |
| SDEI-Dipt-0000595 | <i>Psl. mahanga</i>       | <i>bispina</i> clade               | SDEI                | South Island | Mt. Aspiring National Park     | -44.231/169.231          | MK906324                  | MK906414   | MK906504   | *B |
| SDEI-Dipt-0000904 | <i>Psl. mahanga</i>       | <i>bispina</i> clade               | NZAC (NZAC02028948) | South Island | Fiordland National Park        | -44.686/167.964          | OQ569838                  | OQ581695   | -          | *B |
| SDEI-Dipt-0001008 | <i>Psl. mahanga</i>       | <i>bispina</i> clade               | NZAC (NZAC02028884) | South Island | Fiordland National Park        | -44.948/168.018          | MK906362.2                | MK906454   | MK906544   |    |
| SDEI-Dipt-0000863 | <i>Psl. orite</i>         | <i>bispina</i> clade               | NZAC (NZAC02028880) | North Island | Tongariro National Park        | -39.376/175.444          | MK906347                  | MK906439.2 | MK906529.2 | *B |
| SDEI-Dipt-0001519 | <i>Psl. orite</i>         | <i>bispina</i> clade               | NZAC (NZAC02028952) | North Island | Tongariro National Park        | -39.376/175.444          | OQ573628                  | OQ598614   | -          | *B |



| Specimen number   | Species                   | Taxonomic assignment               | Voucher deposition  | Island       | Locality                | Coordinates (lat./long.) | GenBank accession numbers |            |          |    |
|-------------------|---------------------------|------------------------------------|---------------------|--------------|-------------------------|--------------------------|---------------------------|------------|----------|----|
|                   |                           |                                    |                     |              |                         |                          | COI                       | 16S        | 28S      |    |
| SDEI-Dipt-0001520 | <i>Psl. orite</i>         | <i>bispina</i> clade               | SDEI                | North Island | Tongariro National Park | -39.376/175.444          | OQ644736                  | OQ641729   | -        |    |
| SDEI-Dipt-0001521 | <i>Psl. orite</i>         | <i>bispina</i> clade               | SDEI                | North Island | Tongariro National Park | -39.376/175.444          | MK906400                  | MK906498.2 | MK906588 |    |
| SDEI-Dipt-0001525 | <i>Psl. orite</i>         | <i>bispina</i> clade               | SDEI                | North Island | Tongariro National Park | -39.376/175.444          | OQ644737                  | -          | -        |    |
| SDEI-Dipt-0001529 | <i>Psl. orite</i>         | <i>bispina</i> clade               | NZAC (NZAC02028953) | North Island | Tongariro National Park | -39.376/175.444          | OQ644739                  | -          | -        |    |
| SDEI-Dipt-0001533 | <i>Psl. orite</i>         | <i>bispina</i> clade               | SDEI                | North Island | Tongariro National Park | -39.376/175.444          | OQ644741                  | OQ641731   | -        |    |
| SDEI-Dipt-0000560 | <i>Psl. plicitegmenta</i> | <i>macrotegmenta</i> s. str. clade | NZAC (NZAC02028955) | South Island | Catlins                 | -46.541/169.608          | OQ644688                  | -          | -        |    |
| SDEI-Dipt-0000799 | <i>Psl. plicitegmenta</i> | <i>macrotegmenta</i> s. str. clade | SDEI                | South Island | Catlins                 | -46.466/169.525          | OQ644692                  | -          | -        |    |
| SDEI-Dipt-0001130 | <i>Psl. plicitegmenta</i> | <i>macrotegmenta</i> s. str. clade | SDEI                | South Island | Catlins                 | -46.541/169.608          | OQ644704                  | OQ641708   | -        |    |
| SDEI-Dipt-0001153 | <i>Psl. plicitegmenta</i> | <i>macrotegmenta</i> s. str. clade | SDEI                | South Island | Catlins                 | -46.541/169.608          | MK906366                  | MK906459   | MK906549 | *B |
| SDEI-Dipt-0001155 | <i>Psl. plicitegmenta</i> | <i>macrotegmenta</i> s. str. clade | NZAC (NZAC02028956) | South Island | Catlins                 | -46.541/169.608          | OQ573595                  | OQ598581   | -        | *B |
| SDEI-Dipt-0001158 | <i>Psl. plicitegmenta</i> | <i>macrotegmenta</i> s. str. clade | NZAC (NZAC02028879) | South Island | Catlins                 | -46.541/169.608          | MK906367                  | MK906460   | MK906550 |    |
| SDEI-Dipt-0001225 | <i>Psl. porotaka</i>      | <i>jejuna</i> clade                | NZAC (NZAC02028887) | North Island | Katikati                | -37.55/175.90            | MK906375                  | MK906469   | MK906559 | *B |
| SDEI-Dipt-0001250 | <i>Psl. porotaka</i>      | <i>jejuna</i> clade                | SDEI                | North Island | Katikati                | -37.617/175.878          | MK906383                  | MK906478   | MK906568 | *B |
| SDEI-Dipt-0001005 | <i>Psl. puhuhi</i>        | <i>bispina</i> clade               | NZAC (NZAC02028958) | North Island | Katikati                | -37.566/175.895          | MK906361                  | MK906453   | MK906543 | *B |
| SDEI-Dipt-0001420 | <i>Psl. puhuhi</i>        | <i>bispina</i> clade               | SDEI                | North Island | Katikati                | -37.566/175.895          | OQ573619                  | OQ598605   | -        | *B |
| SDEI-Dipt-0001422 | <i>Psl. puhuhi</i>        | <i>bispina</i> clade               | SDEI                | North Island | Katikati                | -37.566/175.895          | MK906396                  | MK906491   | MK906581 | *B |
| SDEI-Dipt-0001523 | <i>Psl. puhuhi</i>        | <i>bispina</i> clade               | NZAC (NZAC02028823) | North Island | Tongariro National Park | -39.376/175.444          | OQ573629                  | OQ598615   | -        | *B |

| Specimen number   | Species                     | Taxonomic assignment               | Voucher deposition  | Island       | Locality                | Coordinates (lat./long.) | GenBank accession numbers |            |          |      |
|-------------------|-----------------------------|------------------------------------|---------------------|--------------|-------------------------|--------------------------|---------------------------|------------|----------|------|
|                   |                             |                                    |                     |              |                         |                          | COI                       | 16S        | 28S      |      |
| SDEI-Dipt-0000834 | <i>Psl. raki</i>            | <i>jejuna</i> clade                | NZAC (NZAC02029013) | North Island | Waipoua Forest          | -35.65/173.55            | MK906345                  | MK906437   | MK906527 | *B   |
| SDEI-Dipt-0001358 | <i>Psl. robustotegmenta</i> | <i>macrotegmenta</i> s. str. clade | NZAC (NZAC02029012) | North Island | Katikati                | -37.542/175.920          | MK906392                  | MK906487.2 | MK906577 | *B   |
| SDEI-Dipt-0001371 | <i>Psl. robustotegmenta</i> | <i>macrotegmenta</i> s. str. clade | SDEI                | North Island | Katikati                | -37.55/175.90            | MK906393                  | MK906488   | MK906578 | *B   |
| GMNZA054-14       | <i>Psl. sp. I</i>           | <i>bispina</i> clade               | CBGC                | North Island | Waikato                 | -37.802/175.334          | see [58]                  | -          | -        | *B   |
| GMNZM463-14       | <i>Psl. sp. I</i>           | <i>bispina</i> clade               | CBGC                | North Island | Waikato                 | -37.802/175.334          | see [58]                  | -          | -        |      |
| GMNZU122-14       | <i>Psl. sp. I</i>           | <i>bispina</i> clade               | CBGC                | North Island | Waikato                 | -37.802/175.334          | see [58]                  | -          | -        |      |
| GMNZW091-14       | <i>Psl. sp. I</i>           | <i>bispina</i> clade               | CBGC                | North Island | Waikato                 | -37.802/175.334          | see [58]                  | -          | -        | *B   |
| SDEI-Dipt-0000745 | <i>Psl. sp. II</i>          | <i>zealandica</i> clade            | SDEI                | South Island | Cass                    | -43.033/171.75           | MK906337                  | MK906429   | MK906519 | *B   |
| SDEI-Dipt-0001740 | <i>Psl. sp. TAS-1</i>       | <i>macrotegmenta</i> s. l. clade   | SDEI (temporarily)  | Tasmania     | Mt. Weld                | -43.070/146.670          | OQ644774                  | OQ641754   | -        |      |
| SDEI-Dipt-0001751 | <i>Psl. sp. TAS-1</i>       | <i>macrotegmenta</i> s. l. clade   | SDEI (temporarily)  | Tasmania     | Mt. Weld                | -43.070/146.670          | OQ573681                  | OQ598661   | OQ606886 | *B   |
| SDEI-Dipt-0001747 | <i>Psl. sp. TAS-2</i>       | <i>macrotegmenta</i> s. l. clade   | SDEI (temporarily)  | Tasmania     | Mt. Weld                | -43.070/146.670          | OQ573679                  | OQ598659   | OQ606885 | *B   |
| SDEI-Dipt-0001750 | <i>Psl. sp. TAS-2</i>       | <i>macrotegmenta</i> s. l. clade   | SDEI (temporarily)  | Tasmania     | Mt. Weld                | -43.070/146.670          | OQ573680                  | OQ598660   | -        | *B   |
| SDEI-Dipt-0001742 | <i>Psl. sp. TAS-3</i>       | <i>macrotegmenta</i> s. str. clade | SDEI (temporarily)  | Tasmania     | Mt. Weld                | -43.070/146.670          | OQ573678                  | OQ598658   | OQ606884 | *B   |
| SDEI-Dipt-0001133 | <i>Psl. subtilitegmenta</i> | <i>macrotegmenta</i> s. l. clade   | SDEI                | South Island | Catlins                 | -46.541/169.608          | OQ644705                  | OQ641709   | -        |      |
| SDEI-Dipt-0001136 | <i>Psl. subtilitegmenta</i> | <i>macrotegmenta</i> s. l. clade   | NZAC (NZAC02028961) | South Island | Catlins                 | -46.541/169.608          | OQ644707                  | -          | -        |      |
| SDEI-Dipt-0001151 | <i>Psl. subtilitegmenta</i> | <i>macrotegmenta</i> s. l. clade   | NZAC (NZAC02028893) | South Island | Catlins                 | -46.541/169.608          | MK906364                  | MK906457   | MK906547 | *B   |
| SDEI-Dipt-0000885 | <i>Psl. sudhausi</i>        | <i>jejuna</i> clade                | NZAC (NZAC02028814) | South Island | Fiordland National Park | -44.699/168.108          | MK906348                  | MK906440   | MK906530 | *B/H |
| SDEI-Dipt-0000922 | <i>Psl. sudhausi</i>        | <i>jejuna</i> clade                | NZAC (NZAC02028822) | South Island | Fiordland National Park | -44.699/168.108          | OQ569840                  | OQ581697   | -        | H    |

| Specimen number   | Species              | Taxonomic assignment | Voucher deposition  | Island         | Locality                | Coordinates (lat./long.) | GenBank accession numbers |            |          |      |
|-------------------|----------------------|----------------------|---------------------|----------------|-------------------------|--------------------------|---------------------------|------------|----------|------|
|                   |                      |                      |                     |                |                         |                          | COI                       | 16S        | 28S      |      |
| SDEI-Dipt-0000929 | <i>Psl. sudhausi</i> | <i>jejuna</i> clade  | SDEI                | South Island   | Fiordland National Park | -44.699/168.108          | OQ569844                  | OQ581701   | -        | H    |
| SDEI-Dipt-0001009 | <i>Psl. sudhausi</i> | <i>jejuna</i> clade  | NZAC (NZAC02028821) | South Island   | Fiordland National Park | -44.948/168.018          | OQ569857                  | OQ598565   | -        | H    |
| SDEI-Dipt-0001011 | <i>Psl. sudhausi</i> | <i>jejuna</i> clade  | SDEI                | South Island   | Fiordland National Park | -44.948/168.018          | OQ569858                  | -          | -        | H    |
| SDEI-Dipt-0001013 | <i>Psl. sudhausi</i> | <i>jejuna</i> clade  | NZAC (NZAC02028819) | South Island   | Fiordland National Park | -44.948/168.018          | OQ569860                  | -          | -        | H    |
| SDEI-Dipt-0001071 | <i>Psl. sudhausi</i> | <i>jejuna</i> clade  | SDEI                | Stewart Island | Stewart Island          | -46.890/168.022          | OQ569868                  | OQ598572   | -        | *B/H |
| SDEI-Dipt-0001090 | <i>Psl. sudhausi</i> | <i>jejuna</i> clade  | NZAC (NZAC02028894) | Stewart Island | Stewart Island          | -46.898/168.073          | OQ569869                  | OQ598573   | OQ606882 | *B/H |
| SDEI-Dipt-0001093 | <i>Psl. sudhausi</i> | <i>jejuna</i> clade  | SDEI                | Stewart Island | Stewart Island          | -46.898/168.073          | OQ573586                  | OQ598574   | -        | *B/H |
| SDEI-Dipt-0001116 | <i>Psl. sudhausi</i> | <i>jejuna</i> clade  | SDEI                | Stewart Island | Stewart Island          | -46.890/168.022          | OQ573587                  | OQ598575   | -        | H    |
| SDEI-Dipt-0001146 | <i>Psl. sudhausi</i> | <i>jejuna</i> clade  | SDEI                | South Island   | Fiordland National Park | -44.923/168.041          | OQ573591                  | OQ598578   | -        | H    |
| SDEI-Dipt-0001147 | <i>Psl. sudhausi</i> | <i>jejuna</i> clade  | NZAC (NZAC02028815) | South Island   | Fiordland National Park | -44.923/168.041          | OQ573592                  | OQ598579   | -        | H    |
| SDEI-Dipt-0001148 | <i>Psl. sudhausi</i> | <i>jejuna</i> clade  | NZAC (NZAC02028816) | South Island   | Fiordland National Park | -44.923/168.041          | OQ573593                  | OQ598580   | -        | H    |
| SDEI-Dipt-0001149 | <i>Psl. sudhausi</i> | <i>jejuna</i> clade  | SDEI                | South Island   | Fiordland National Park | -44.923/168.041          | OQ573594                  | -          | -        | H    |
| SDEI-Dipt-0001167 | <i>Psl. sudhausi</i> | <i>jejuna</i> clade  | NZAC (NZAC02028818) | South Island   | Fiordland National Park | -44.906/168.063          | MK906368                  | MK906461.2 | MK906551 | H    |
| SDEI-Dipt-0001170 | <i>Psl. sudhausi</i> | <i>jejuna</i> clade  | SDEI                | South Island   | Fiordland National Park | -44.906/168.063          | MK906369                  | MK906462   | MK906552 | H    |
| SDEI-Dipt-0001175 | <i>Psl. sudhausi</i> | <i>jejuna</i> clade  | NZAC (NZAC02028817) | South Island   | Fiordland National Park | -44.906/168.063          | MK906370                  | MK906463.2 | MK906553 | *B/H |
| SDEI-Dipt-0001177 | <i>Psl. sudhausi</i> | <i>jejuna</i> clade  | SDEI                | South Island   | Fiordland National Park | -44.923/168.041          | OQ573604                  | OQ598590   | -        | *B/H |
| SDEI-Dipt-0001459 | <i>Psl. sudhausi</i> | <i>jejuna</i> clade  | SDEI                | South Island   | Fiordland National Park | -44.906/168.063          | MK906397                  | MK906493.2 | MK906583 | H    |

| Specimen number   | Species                  | Taxonomic assignment | Voucher deposition  | Island       | Locality                   | Coordinates (lat./long.) | GenBank accession numbers |            |            |      |
|-------------------|--------------------------|----------------------|---------------------|--------------|----------------------------|--------------------------|---------------------------|------------|------------|------|
|                   |                          |                      |                     |              |                            |                          | COI                       | 16S        | 28S        |      |
| SDEI-Dipt-0001528 | <i>Psl. teo</i>          | <i>bispina</i> clade | NZAC (NZAC02028895) | North Island | Tongariro National Park    | -39.376/175.444          | MK906402                  | MK906500.2 | MK906590   | *B   |
| SDEI-Dipt-0000513 | <i>Psl. tewaipounamu</i> | <i>jejuna</i> clade  | NZAC (NZAC02028861) | South Island | Mt. Aspiring National Park | -44.231/169.231          | MK906323                  | MK906413   | MK906503   | H    |
| SDEI-Dipt-0000614 | <i>Psl. tewaipounamu</i> | <i>jejuna</i> clade  | NZAC (NZAC02028977) | South Island | Catlins                    | -46.466/169.525          | OQ569817                  | OQ581680   | -          | H    |
| SDEI-Dipt-0000752 | <i>Psl. tewaipounamu</i> | <i>jejuna</i> clade  | SDEI                | South Island | Maruia Forest              | -42.033/172.293          | MK906338                  | MK906430.2 | MK906520   | *B/H |
| SDEI-Dipt-0000788 | <i>Psl. tewaipounamu</i> | <i>jejuna</i> clade  | NZAC (NZAC02028871) | South Island | Maruia Forest              | -42.033/172.293          | OQ569825                  | OQ581685   | -          | H    |
| SDEI-Dipt-0000801 | <i>Psl. tewaipounamu</i> | <i>jejuna</i> clade  | NZAC (NZAC02028976) | South Island | Catlins                    | -46.466/169.525          | OQ569826                  | OQ581686   | -          | *B/H |
| SDEI-Dipt-0000814 | <i>Psl. tewaipounamu</i> | <i>jejuna</i> clade  | SDEI                | South Island | Catlins                    | -46.466/169.525          | OQ644693                  | OQ581687   | -          | H    |
| SDEI-Dipt-0000871 | <i>Psl. tewaipounamu</i> | <i>jejuna</i> clade  | SDEI                | South Island | Fiordland National Park    | -44.913/168.047          | OQ569831                  | -          | -          | H    |
| SDEI-Dipt-0000879 | <i>Psl. tewaipounamu</i> | <i>jejuna</i> clade  | SDEI                | South Island | Fiordland National Park    | -44.699/168.108          | OQ569832                  | OQ581690   | -          | H    |
| SDEI-Dipt-0000881 | <i>Psl. tewaipounamu</i> | <i>jejuna</i> clade  | SDEI                | South Island | Fiordland National Park    | -44.699/168.108          | OQ569833                  | OQ581691   | -          | H    |
| SDEI-Dipt-0000907 | <i>Psl. tewaipounamu</i> | <i>jejuna</i> clade  | SDEI                | South Island | Fiordland National Park    | -44.699/168.108          | MK906350                  | MK906442   | MK906532.2 | H    |
| SDEI-Dipt-0000910 | <i>Psl. tewaipounamu</i> | <i>jejuna</i> clade  | NZAC (NZAC02028862) | South Island | Fiordland National Park    | -44.699/168.108          | OQ569839                  | OQ581696   | -          | H    |
| SDEI-Dipt-0000924 | <i>Psl. tewaipounamu</i> | <i>jejuna</i> clade  | SDEI                | South Island | Fiordland National Park    | -44.699/168.108          | OQ569841                  | OQ581698   | -          | H    |
| SDEI-Dipt-0000927 | <i>Psl. tewaipounamu</i> | <i>jejuna</i> clade  | NZAC (NZAC02028863) | South Island | Fiordland National Park    | -44.699/168.108          | OQ569842                  | OQ581699   | -          | H    |
| SDEI-Dipt-0000928 | <i>Psl. tewaipounamu</i> | <i>jejuna</i> clade  | NZAC (NZAC02028864) | South Island | Fiordland National Park    | -44.699/168.108          | OQ569843                  | OQ581700   | -          | H    |
| SDEI-Dipt-0000934 | <i>Psl. tewaipounamu</i> | <i>jejuna</i> clade  | NZAC (NZAC02028858) | South Island | Fiordland National Park    | -44.699/168.108          | OQ569845                  | OQ581702   | -          | H    |
| SDEI-Dipt-0000942 | <i>Psl. tewaipounamu</i> | <i>jejuna</i> clade  | SDEI                | South Island | Maruia Springs             | -42.382/172.262          | OQ569846                  | -          | -          | H    |

| Specimen number   | Species                  | Taxonomic assignment | Voucher deposition  | Island       | Locality                | Coordinates (lat./long.) | GenBank accession numbers |          |            |      |
|-------------------|--------------------------|----------------------|---------------------|--------------|-------------------------|--------------------------|---------------------------|----------|------------|------|
|                   |                          |                      |                     |              |                         |                          | COI                       | 16S      | 28S        |      |
| SDEI-Dipt-0000950 | <i>Psl. tewaipounamu</i> | jejuna clade         | SDEI                | South Island | Fiordland National Park | -45.000/168.010          | OQ569847                  | OQ581703 | -          | H    |
| SDEI-Dipt-0000952 | <i>Psl. tewaipounamu</i> | jejuna clade         | NZAC (NZAC02028852) | South Island | Fiordland National Park | -45.000/168.010          | OQ569848                  | OQ581704 | -          | H    |
| SDEI-Dipt-0000956 | <i>Psl. tewaipounamu</i> | jejuna clade         | NZAC (NZAC02028896) | South Island | Fiordland National Park | -45.000/168.010          | MK906353                  | MK906445 | MK906535   | *B/H |
| SDEI-Dipt-0000960 | <i>Psl. tewaipounamu</i> | jejuna clade         | NZAC (NZAC02028867) | South Island | Maruia Forest           | -42.033/172.293          | MK906354.2                | MK906446 | MK906536   | H    |
| SDEI-Dipt-0000964 | <i>Psl. tewaipounamu</i> | jejuna clade         | SDEI                | South Island | Fiordland National Park | -45.000/168.010          | OQ569849                  | OQ581705 | -          | H    |
| SDEI-Dipt-0000973 | <i>Psl. tewaipounamu</i> | jejuna clade         | SDEI                | South Island | Maruia Springs          | -42.382/172.262          | OQ569850                  | OQ581706 | -          | *B/H |
| SDEI-Dipt-0000988 | <i>Psl. tewaipounamu</i> | jejuna clade         | NZAC (NZAC02028869) | South Island | Maruia Springs          | -42.382/172.262          | OQ569852                  | OQ581707 | -          | H    |
| SDEI-Dipt-0000994 | <i>Psl. tewaipounamu</i> | jejuna clade         | SDEI                | South Island | Fiordland National Park | -44.808/168.109          | MK906358                  | MK906450 | MK906540.2 | H    |
| SDEI-Dipt-0001006 | <i>Psl. tewaipounamu</i> | jejuna clade         | NZAC (NZAC02028855) | South Island | Fiordland National Park | -44.948/168.018          | OQ569856                  | OQ598564 | -          | H    |
| SDEI-Dipt-0001012 | <i>Psl. tewaipounamu</i> | jejuna clade         | SDEI                | South Island | Fiordland National Park | -44.948/168.018          | OQ569859                  | -        | -          | H    |
| SDEI-Dipt-0001014 | <i>Psl. tewaipounamu</i> | jejuna clade         | NZAC (NZAC02028856) | South Island | Fiordland National Park | -44.948/168.018          | OQ569861                  | -        | -          | H    |
| SDEI-Dipt-0001016 | <i>Psl. tewaipounamu</i> | jejuna clade         | NZAC (NZAC02028835) | South Island | Fiordland National Park | -44.948/168.018          | OQ569862                  | OQ598566 | -          | H    |
| SDEI-Dipt-0001017 | <i>Psl. tewaipounamu</i> | jejuna clade         | SDEI                | South Island | Fiordland National Park | -44.948/168.018          | OQ569863                  | OQ598567 | -          | H    |
| SDEI-Dipt-0001025 | <i>Psl. tewaipounamu</i> | jejuna clade         | SDEI                | South Island | Fiordland National Park | -44.948/168.018          | OQ569864                  | OQ598568 | -          | H    |
| SDEI-Dipt-0001038 | <i>Psl. tewaipounamu</i> | jejuna clade         | SDEI                | South Island | Maruia Forest           | -42.033/172.293          | OQ569865                  | OQ598569 | -          | H    |
| SDEI-Dipt-0001044 | <i>Psl. tewaipounamu</i> | jejuna clade         | SDEI                | South Island | Maruia Forest           | -42.033/172.293          | OQ569866                  | OQ598570 | -          | H    |
| SDEI-Dipt-0001045 | <i>Psl. tewaipounamu</i> | jejuna clade         | NZAC (NZAC02028868) | South Island | Maruia Forest           | -42.033/172.293          | OQ569867                  | OQ598571 | -          | *B/H |
| SDEI-Dipt-0001132 | <i>Psl. tewaipounamu</i> | jejuna clade         | SDEI                | South Island | Catlins                 | -46.541/169.608          | OQ573588                  | OQ598576 | OQ606883   | *B/H |

| Specimen number   | Species                  | Taxonomic assignment               | Voucher deposition  | Island       | Locality                   | Coordinates (lat./long.) | GenBank accession numbers |          |          |      |
|-------------------|--------------------------|------------------------------------|---------------------|--------------|----------------------------|--------------------------|---------------------------|----------|----------|------|
|                   |                          |                                    |                     |              |                            |                          | COI                       | 16S      | 28S      |      |
| SDEI-Dipt-0001139 | <i>Psl. tewaipounamu</i> | <i>jejuna</i> clade                | NZAC (NZAC02028838) | South Island | Catlins                    | -46.541/169.608          | OQ573589                  | OQ598577 | OQ640203 | *B/H |
| SDEI-Dipt-0001143 | <i>Psl. tewaipounamu</i> | <i>jejuna</i> clade                | SDEI                | South Island | Fiordland National Park    | -44.923/168.041          | OQ573590                  | -        | -        | H    |
| SDEI-Dipt-0001156 | <i>Psl. tewaipounamu</i> | <i>jejuna</i> clade                | SDEI                | South Island | Catlins                    | -46.541/169.608          | OQ573596                  | OQ598582 | OQ640202 | *B/H |
| SDEI-Dipt-0001165 | <i>Psl. tewaipounamu</i> | <i>jejuna</i> clade                | SDEI                | South Island | Fiordland National Park    | -44.906/168.063          | OQ573599                  | OQ598585 | -        | H    |
| SDEI-Dipt-0001169 | <i>Psl. tewaipounamu</i> | <i>jejuna</i> clade                | NZAC (NZAC02028854) | South Island | Fiordland National Park    | -44.906/168.063          | OQ573600                  | OQ598586 | -        | H    |
| SDEI-Dipt-0001172 | <i>Psl. tewaipounamu</i> | <i>jejuna</i> clade                | SDEI                | South Island | Fiordland National Park    | -44.906/168.063          | OQ573601                  | OQ598587 | -        | H    |
| SDEI-Dipt-0001173 | <i>Psl. tewaipounamu</i> | <i>jejuna</i> clade                | NZAC (NZAC02028853) | South Island | Fiordland National Park    | -44.906/168.063          | OQ573602                  | OQ598588 | -        | H    |
| SDEI-Dipt-0001174 | <i>Psl. tewaipounamu</i> | <i>jejuna</i> clade                | SDEI                | South Island | Fiordland National Park    | -44.906/168.063          | OQ573603                  | OQ598589 | -        | H    |
| SDEI-Dipt-0001179 | <i>Psl. tewaipounamu</i> | <i>jejuna</i> clade                | NZAC (NZAC02028866) | South Island | Maruia Forest              | -42.033/172.293          | OQ573605                  | OQ598591 | -        | H    |
| SDEI-Dipt-0001180 | <i>Psl. tewaipounamu</i> | <i>jejuna</i> clade                | SDEI                | South Island | Maruia Forest              | -42.033/172.293          | OQ573606                  | OQ598592 | -        | H    |
| SDEI-Dipt-0001181 | <i>Psl. tewaipounamu</i> | <i>jejuna</i> clade                | SDEI                | South Island | Maruia Forest              | -42.033/172.293          | OQ573607                  | OQ598593 | -        | H    |
| SDEI-Dipt-0001206 | <i>Psl. tewaipounamu</i> | <i>jejuna</i> clade                | NZAC (NZAC02028857) | South Island | Fiordland National Park    | -44.923/168.041          | OQ573609                  | OQ598595 | -        | *B/H |
| SDEI-Dipt-0001481 | <i>Psl. tewaipounamu</i> | <i>jejuna</i> clade                | NZAC (NZAC02028860) | South Island | Rahu Scenic Reserve        | -42.273/171.980          | OQ573620                  | OQ598606 | -        | H    |
| SDEI-Dipt-0001490 | <i>Psl. tewaipounamu</i> | <i>jejuna</i> clade                | NZAC (NZAC02028859) | South Island | Rahu Scenic Reserve        | -42.273/171.980          | OQ573621                  | OQ598607 | -        | *B/H |
| SDEI-Dipt-0001492 | <i>Psl. tewaipounamu</i> | <i>jejuna</i> clade                | SDEI                | South Island | Rahu Scenic Reserve        | -42.273/171.980          | OQ573622                  | OQ598608 | -        | H    |
| SDEI-Dipt-0001493 | <i>Psl. tewaipounamu</i> | <i>jejuna</i> clade                | SDEI                | South Island | Rahu Scenic Reserve        | -42.273/171.980          | OQ573623                  | OQ598609 | -        | H    |
| SDEI-Dipt-0001506 | <i>Psl. tewaipounamu</i> | <i>jejuna</i> clade                | SDEI                | South Island | Mt. Aspiring National Park | -44.231/169.231          | OQ573624                  | OQ598610 | -        | H    |
| SDEI-Dipt-0000531 | <i>Psl. tonnoiri</i>     | <i>macrotegmenta</i> s. str. clade | NZAC (NZAC02028979) | South Island | Catlins                    | -46.541/169.608          | OQ569815                  | -        | -        | H    |

| Specimen number   | Species              | Taxonomic assignment                  | Voucher deposition     | Island       | Locality                | Coordinates (lat./long.) | GenBank accession numbers |          |          |      |
|-------------------|----------------------|---------------------------------------|------------------------|--------------|-------------------------|--------------------------|---------------------------|----------|----------|------|
|                   |                      |                                       |                        |              |                         |                          | COI                       | 16S      | 28S      |      |
| SDEI-Dipt-0000597 | <i>Psl. tonnoiri</i> | <i>macrotegmenta</i><br>s. str. clade | SDEI                   | North Island | Tongariro National Park | -39.393/175.450          | MK906325                  | MK906415 | MK906505 | H    |
| SDEI-Dipt-0000719 | <i>Psl. tonnoiri</i> | <i>macrotegmenta</i><br>s. str. clade | NZAC<br>(NZAC02028980) | South Island | Cass                    | -43.033/171.75           | OQ569821                  | -        | -        | H    |
| SDEI-Dipt-0000722 | <i>Psl. tonnoiri</i> | <i>macrotegmenta</i><br>s. str. clade | SDEI                   | South Island | Cass                    | -43.033/171.75           | OQ569822                  | -        | -        | H    |
| SDEI-Dipt-0000813 | <i>Psl. tonnoiri</i> | <i>macrotegmenta</i><br>s. str. clade | NZAC<br>(NZAC02028981) | North Island | Tongariro National Park | -39.376/175.444          | OQ569827                  | -        | -        | H    |
| SDEI-Dipt-0000856 | <i>Psl. tonnoiri</i> | <i>macrotegmenta</i><br>s. str. clade | NZAC<br>(NZAC02028872) | North Island | Tongariro National Park | -39.376/175.444          | OQ569830                  | -        | -        | H    |
| SDEI-Dipt-0000980 | <i>Psl. tonnoiri</i> | <i>macrotegmenta</i><br>s. str. clade | SDEI                   | North Island | Tongariro National Park | -39.393/175.450          | MK906357                  | MK906449 | MK906539 | *B/H |
| SDEI-Dipt-0001140 | <i>Psl. tonnoiri</i> | <i>macrotegmenta</i><br>s. str. clade | SDEI                   | South Island | Catlins                 | -46.541/169.608          | MK906363                  | MK906456 | MK906546 | H    |
| SDEI-Dipt-0001152 | <i>Psl. tonnoiri</i> | <i>macrotegmenta</i><br>s. str. clade | SDEI                   | South Island | Catlins                 | -46.541/169.608          | MK906365                  | MK906458 | MK906548 | *B/H |
| SDEI-Dipt-0001532 | <i>Psl. tonnoiri</i> | <i>macrotegmenta</i><br>s. str. clade | NZAC<br>(NZAC02028982) | North Island | Tongariro National Park | -39.376/175.444          | OQ573631                  | OQ598617 | -        | *B/H |
| SDEI-Dipt-0001534 | <i>Psl. tonnoiri</i> | <i>macrotegmenta</i><br>s. str. clade | SDEI                   | North Island | Tongariro National Park | -39.376/175.444          | OQ573632                  | -        | -        | H    |
| SDEI-Dipt-0001536 | <i>Psl. tonnoiri</i> | <i>macrotegmenta</i><br>s. str. clade | NZAC<br>(NZAC02028978) | North Island | Tongariro National Park | -39.393/175.450          | OQ644743                  | -        | -        |      |
| SDEI-Dipt-0001588 | <i>Psl. tonnoiri</i> | <i>macrotegmenta</i><br>s. str. clade | SDEI                   | North Island | Tongariro National Park | -39.376/175.444          | OQ573656                  | OQ598640 | -        | H    |
| SDEI-Dipt-0001590 | <i>Psl. tonnoiri</i> | <i>macrotegmenta</i><br>s. str. clade | SDEI                   | North Island | Tongariro National Park | -39.393/175.450          | OQ573657                  | OQ598641 | -        | H    |
| SDEI-Dipt-0001591 | <i>Psl. tonnoiri</i> | <i>macrotegmenta</i><br>s. str. clade | SDEI                   | North Island | Tongariro National Park | -39.393/175.450          | OQ573658                  | OQ598642 | -        | H    |
| SDEI-Dipt-0001592 | <i>Psl. tonnoiri</i> | <i>macrotegmenta</i><br>s. str. clade | SDEI                   | North Island | Tongariro National Park | -39.393/175.450          | OQ573659                  | OQ598643 | -        | H    |
| SDEI-Dipt-0001593 | <i>Psl. tonnoiri</i> | <i>macrotegmenta</i><br>s. str. clade | SDEI                   | North Island | Tongariro National Park | -39.393/175.450          | OQ573660                  | OQ598644 | -        | H    |
| SDEI-Dipt-0001594 | <i>Psl. tonnoiri</i> | <i>macrotegmenta</i><br>s. str. clade | SDEI                   | North Island | Tongariro National Park | -39.393/175.450          | OQ573661                  | OQ598645 | -        | H    |

| Specimen number   | Species                       | Taxonomic assignment               | Voucher deposition  | Island       | Locality                | Coordinates (lat./long.) | GenBank accession numbers |            |          |    |
|-------------------|-------------------------------|------------------------------------|---------------------|--------------|-------------------------|--------------------------|---------------------------|------------|----------|----|
|                   |                               |                                    |                     |              |                         |                          | COI                       | 16S        | 28S      |    |
| SDEI-Dipt-0001595 | <i>Psl. tonnoiri</i>          | <i>macrotegmenta</i> s. str. clade | SDEI                | North Island | Tongariro National Park | -39.393/175.450          | OQ573662                  | OQ598646   | -        | H  |
| SDEI-Dipt-0001596 | <i>Psl. tonnoiri</i>          | <i>macrotegmenta</i> s. str. clade | SDEI                | North Island | Tongariro National Park | -39.393/175.450          | OQ573663                  | OQ598647   | -        | H  |
| SDEI-Dipt-0001597 | <i>Psl. tonnoiri</i>          | <i>macrotegmenta</i> s. str. clade | PABM                | North Island | Tongariro National Park | -39.393/175.450          | OQ573664                  | OQ598648   | -        | H  |
| SDEI-Dipt-0001598 | <i>Psl. tonnoiri</i>          | <i>macrotegmenta</i> s. str. clade | SDEI                | North Island | Tongariro National Park | -39.393/175.450          | OQ573665                  | OQ598649   | -        | H  |
| SDEI-Dipt-0001599 | <i>Psl. tonnoiri</i>          | <i>macrotegmenta</i> s. str. clade | SDEI                | North Island | Tongariro National Park | -39.393/175.450          | OQ573666                  | OQ598650   | -        | H  |
| SDEI-Dipt-0001600 | <i>Psl. tonnoiri</i>          | <i>macrotegmenta</i> s. str. clade | SDEI                | North Island | Tongariro National Park | -39.393/175.450          | OQ573667                  | OQ598651   | -        | H  |
| SDEI-Dipt-0001601 | <i>Psl. tonnoiri</i>          | <i>macrotegmenta</i> s. str. clade | SDEI                | North Island | Tongariro National Park | -39.393/175.450          | OQ573668                  | OQ598652   | -        | H  |
| SDEI-Dipt-0001602 | <i>Psl. tonnoiri</i>          | <i>macrotegmenta</i> s. str. clade | SDEI                | North Island | Tongariro National Park | -39.393/175.450          | OQ573669                  | OQ598653   | -        | H  |
| SDEI-Dipt-0001604 | <i>Psl. tonnoiri</i>          | <i>macrotegmenta</i> s. str. clade | SDEI                | North Island | Tongariro National Park | -39.393/175.450          | OQ573670                  | OQ598654   | -        | H  |
| SDEI-Dipt-0001194 | <i>Psl. tuakana</i>           | <i>jejuna</i> clade                | NZAC (NZAC02028897) | North Island | Tongariro National Park | -39.393/175.450          | MK906372                  | MK906465.2 | MK906555 | *B |
| SDEI-Dipt-0001337 | <i>Psl. tuakana</i>           | <i>jejuna</i> clade                | SDEI                | North Island | Tongariro National Park | -39.393/175.450          | MK906389                  | MK906484.2 | MK906574 |    |
| SDEI-Dipt-0000665 | <i>Psl. wernermohrigi</i>     | <i>macrotegmenta</i> s. str. clade | SDEI                | North Island | Katikati                | -37.55/175.90            | MK906333                  | MK906424   | MK906514 | *B |
| SDEI-Dipt-0000670 | <i>Psl. wernermohrigi</i>     | <i>macrotegmenta</i> s. str. clade | NZAC (NZAC02028873) | North Island | Katikati                | -37.55/175.90            | MK906334                  | MK906425   | MK906515 |    |
| SDEI-Dipt-0000674 | <i>Psl. wernermohrigi</i>     | <i>macrotegmenta</i> s. str. clade | NZAC (NZAC02028874) | North Island | Katikati                | -37.55/175.90            | MK906335                  | MK906426   | MK906516 | *B |
| SDEI-Dipt-0000681 | <i>Psl. cf. wernermohrigi</i> | <i>macrotegmenta</i> s. str. clade | SDEI                | North Island | Katikati                | -37.55/175.90            | MK906336                  | MK906427   | MK906517 | *B |
| SDEI-Dipt-0001223 | <i>Psl. wernermohrigi</i>     | <i>macrotegmenta</i> s. str. clade | NZAC (NZAC02029047) | North Island | Katikati                | -37.55/175.90            | MK906373                  | MK906467   | MK906557 |    |
| SDEI-Dipt-0001227 | <i>Psl. wernermohrigi</i>     | <i>macrotegmenta</i> s. str. clade | NZAC (NZAC02028987) | North Island | Katikati                | -37.55/175.90            | MK906376                  | MK906470   | MK906560 |    |



| Specimen number   | Species                       | Taxonomic assignment               | Voucher deposition  | Island       | Locality                | Coordinates (lat./long.) | GenBank accession numbers |            |          |      |
|-------------------|-------------------------------|------------------------------------|---------------------|--------------|-------------------------|--------------------------|---------------------------|------------|----------|------|
|                   |                               |                                    |                     |              |                         |                          | COI                       | 16S        | 28S      |      |
| SDEI-Dipt-0001232 | <i>Psl. cf. wernermohrigi</i> | <i>macrotegmenta</i> s. str. clade | SDEI                | North Island | Katikati                | -37.55/175.90            | MK906377                  | MK906471   | MK906561 |      |
| SDEI-Dipt-0001234 | <i>Psl. wernermohrigi</i>     | <i>macrotegmenta</i> s. str. clade | SDEI                | North Island | Katikati                | -37.55/175.90            | MK906378                  | MK906472   | MK906562 |      |
| SDEI-Dipt-0001235 | <i>Psl. wernermohrigi</i>     | <i>macrotegmenta</i> s. str. clade | SDEI                | North Island | Katikati                | -37.55/175.90            | MK906407                  | MK906473   | MK906563 | *B   |
| SDEI-Dipt-0001238 | <i>Psl. wernermohrigi</i>     | <i>macrotegmenta</i> s. str. clade | NZAC (NZAC02028983) | North Island | Katikati                | -37.55/175.90            | MK906380                  | MK906475   | MK906565 |      |
| SDEI-Dipt-0001245 | <i>Psl. wernermohrigi</i>     | <i>macrotegmenta</i> s. str. clade | NZAC (NZAC02028986) | North Island | Katikati                | -37.55/175.90            | MK906381                  | MK906476   | MK906566 |      |
| SDEI-Dipt-0001270 | <i>Psl. wernermohrigi</i>     | <i>macrotegmenta</i> s. str. clade | NZAC (NZAC02028985) | North Island | Pukororo Miranda        | -37.185/175.314          | MK906385                  | MK906480   | MK906570 | *B   |
| SDEI-Dipt-0001334 | <i>Psl. wernermohrigi</i>     | <i>macrotegmenta</i> s. str. clade | SDEI                | North Island | Katikati                | -37.55/175.90            | MK906387                  | MK906482   | MK906572 | *B   |
| SDEI-Dipt-0001373 | <i>Psl. wernermohrigi</i>     | <i>macrotegmenta</i> s. str. clade | SDEI                | North Island | Katikati                | -37.55/175.90            | MK906394                  | MK906489   | MK906579 | *B   |
| SDEI-Dipt-0001386 | <i>Psl. whakahara</i>         | <i>jejuna</i> clade                | SDEI                | South Island | Kahurangi National Park | -41.096/172.704          | OQ644728                  | OQ641724   | -        |      |
| SDEI-Dipt-0001439 | <i>Psl. whakahara</i>         | <i>jejuna</i> clade                | NZAC (NZAC02029048) | South Island | Kahurangi National Park | -41.096/172.704          | MK906408                  | MK906492   | MK906582 | *B   |
| SDEI-Dipt-0001336 | <i>Psl. whena</i>             | <i>jejuna</i> clade                | NZAC (NZAC02029049) | North Island | Katikati                | -37.55/175.90            | MK906388                  | MK906483.2 | MK906573 | *B   |
| SDEI-Dipt-0000622 | <i>Psl. zealandica</i>        | <i>zealandica</i> clade            | NZAC (NZAC02028996) | North Island | Tongariro National Park | -39.393/175.450          | OQ569819                  | OQ581681   | -        | *B/H |
| SDEI-Dipt-0000623 | <i>Psl. zealandica</i>        | <i>zealandica</i> clade            | SDEI                | North Island | Tongariro National Park | -39.393/175.450          | MK906328                  | MK906419   | MK906509 | H    |
| SDEI-Dipt-0000783 | <i>Psl. zealandica</i>        | <i>zealandica</i> clade            | SDEI                | North Island | Tongariro National Park | -39.376/175.444          | OQ569824                  | OQ581684   | -        | *B/H |
| SDEI-Dipt-0000882 | <i>Psl. zealandica</i>        | <i>zealandica</i> clade            | SDEI                | South Island | Fiordland National Park | -44.699/168.108          | OQ569834                  | OQ581692   | -        | H    |
| SDEI-Dipt-0000883 | <i>Psl. zealandica</i>        | <i>zealandica</i> clade            | NZAC (NZAC02029008) | South Island | Fiordland National Park | -44.699/168.108          | OQ569835                  | OQ581693   | -        | H    |
| SDEI-Dipt-0000884 | <i>Psl. zealandica</i>        | <i>zealandica</i> clade            | SDEI                | South Island | Fiordland National Park | -44.699/168.108          | OQ569836                  | -          | -        | H    |

| Specimen number   | Species                | Taxonomic assignment    | Voucher deposition  | Island       | Locality                | Coordinates (lat./long.) | GenBank accession numbers |          |            |      |
|-------------------|------------------------|-------------------------|---------------------|--------------|-------------------------|--------------------------|---------------------------|----------|------------|------|
|                   |                        |                         |                     |              |                         |                          | COI                       | 16S      | 28S        |      |
| SDEI-Dipt-0000886 | <i>Psl. zealandica</i> | <i>zealandica</i> clade | SDEI                | South Island | Fiordland National Park | -44.699/168.108          | MK906349                  | MK906441 | MK906531.2 | *B/H |
| SDEI-Dipt-0000998 | <i>Psl. zealandica</i> | <i>zealandica</i> clade | NZAC (NZAC02028994) | North Island | Tongariro National Park | -39.393/175.450          | MK906360                  | MK906452 | MK906542   | *B/H |
| SDEI-Dipt-0001001 | <i>Psl. zealandica</i> | <i>zealandica</i> clade | SDEI                | North Island | Tongariro National Park | -39.393/175.450          | OQ569854                  | OQ581709 | -          | H    |
| SDEI-Dipt-0001002 | <i>Psl. zealandica</i> | <i>zealandica</i> clade | NZAC (NZAC02028995) | North Island | Tongariro National Park | -39.393/175.450          | OQ569855                  | OQ581710 | -          | *B/H |
| SDEI-Dipt-0001162 | <i>Psl. zealandica</i> | <i>zealandica</i> clade | SDEI                | South Island | Cass                    | -43.033/171.75           | OQ573597                  | OQ598583 | -          | *B/H |
| SDEI-Dipt-0001163 | <i>Psl. zealandica</i> | <i>zealandica</i> clade | SDEI                | South Island | Cass                    | -43.033/171.75           | OQ573598                  | OQ598584 | -          | *B/H |
| SDEI-Dipt-0001182 | <i>Psl. zealandica</i> | <i>zealandica</i> clade | SDEI                | South Island | Cass                    | -43.033/171.75           | OQ573608                  | OQ598594 | -          | *B/H |
| SDEI-Dipt-0001239 | <i>Psl. zealandica</i> | <i>zealandica</i> clade | SDEI                | North Island | Tongariro National Park | -39.393/175.450          | OQ573611                  | OQ598597 | -          | H    |
| SDEI-Dipt-0001242 | <i>Psl. zealandica</i> | <i>zealandica</i> clade | SDEI                | North Island | Tongariro National Park | -39.393/175.450          | OQ573612                  | OQ598598 | -          | H    |
| SDEI-Dipt-0001243 | <i>Psl. zealandica</i> | <i>zealandica</i> clade | NZAC (NZAC02029010) | North Island | Tongariro National Park | -39.393/175.450          | OQ573613                  | OQ598599 | -          | H    |
| SDEI-Dipt-0001244 | <i>Psl. zealandica</i> | <i>zealandica</i> clade | SDEI                | North Island | Tongariro National Park | -39.393/175.450          | OQ573614                  | OQ598600 | -          | H    |
| SDEI-Dipt-0001246 | <i>Psl. zealandica</i> | <i>zealandica</i> clade | NZAC (NZAC02029009) | North Island | Tongariro National Park | -39.393/175.450          | OQ573615                  | OQ598601 | -          | *B/H |
| SDEI-Dipt-0001248 | <i>Psl. zealandica</i> | <i>zealandica</i> clade | SDEI                | North Island | Tongariro National Park | -39.393/175.450          | OQ573616                  | OQ598602 | -          | H    |
| SDEI-Dipt-0001254 | <i>Psl. zealandica</i> | <i>zealandica</i> clade | SDEI                | North Island | Tongariro National Park | -39.393/175.450          | OQ573617                  | OQ598603 | -          | H    |
| SDEI-Dipt-0001538 | <i>Psl. zealandica</i> | <i>zealandica</i> clade | SDEI                | North Island | Tongariro National Park | -39.393/175.450          | OQ573634                  | OQ598619 | -          | H    |
| SDEI-Dipt-0001539 | <i>Psl. zealandica</i> | <i>zealandica</i> clade | SDEI                | North Island | Tongariro National Park | -39.393/175.450          | OQ573635                  | OQ598620 | -          | H    |
| SDEI-Dipt-0001540 | <i>Psl. zealandica</i> | <i>zealandica</i> clade | SDEI                | North Island | Tongariro National Park | -39.393/175.450          | OQ573636                  | OQ598621 | -          | H    |

| Specimen number   | Species                | Taxonomic assignment    | Voucher deposition  | Island       | Locality                | Coordinates (lat./long.) | GenBank accession numbers |          |     |      |
|-------------------|------------------------|-------------------------|---------------------|--------------|-------------------------|--------------------------|---------------------------|----------|-----|------|
|                   |                        |                         |                     |              |                         |                          | COI                       | 16S      | 28S |      |
| SDEI-Dipt-0001541 | <i>Psl. zealandica</i> | <i>zealandica</i> clade | SDEI                | North Island | Tongariro National Park | -39.393/175.450          | OQ573637                  | OQ598622 | -   | H    |
| SDEI-Dipt-0001542 | <i>Psl. zealandica</i> | <i>zealandica</i> clade | SDEI                | North Island | Tongariro National Park | -39.393/175.450          | OQ573638                  | OQ598623 | -   | H    |
| SDEI-Dipt-0001543 | <i>Psl. zealandica</i> | <i>zealandica</i> clade | SDEI                | South Island | Fiordland National Park | -44.699/168.108          | OQ573639                  | OQ598624 | -   | H    |
| SDEI-Dipt-0001544 | <i>Psl. zealandica</i> | <i>zealandica</i> clade | NZAC (NZAC02029007) | South Island | Fiordland National Park | -44.699/168.108          | OQ573640                  | OQ598625 | -   | H    |
| SDEI-Dipt-0001545 | <i>Psl. zealandica</i> | <i>zealandica</i> clade | SDEI                | South Island | Fiordland National Park | -44.699/168.108          | OQ573641                  | OQ598626 | -   | H    |
| SDEI-Dipt-0001546 | <i>Psl. zealandica</i> | <i>zealandica</i> clade | NZAC (NZAC02029006) | South Island | Fiordland National Park | -44.699/168.108          | OQ573642                  | OQ598627 | -   | H    |
| SDEI-Dipt-0001547 | <i>Psl. zealandica</i> | <i>zealandica</i> clade | SDEI                | South Island | Fiordland National Park | -44.699/168.108          | OQ573643                  | OQ598628 | -   | H    |
| SDEI-Dipt-0001548 | <i>Psl. zealandica</i> | <i>zealandica</i> clade | NZAC (NZAC02029005) | South Island | Fiordland National Park | -44.699/168.108          | OQ573644                  | OQ598629 | -   | H    |
| SDEI-Dipt-0001549 | <i>Psl. zealandica</i> | <i>zealandica</i> clade | SDEI                | South Island | Fiordland National Park | -44.699/168.108          | OQ573645                  | OQ598630 | -   | H    |
| SDEI-Dipt-0001550 | <i>Psl. zealandica</i> | <i>zealandica</i> clade | SDEI                | South Island | Fiordland National Park | -44.699/168.108          | OQ573646                  | OQ598631 | -   | H    |
| SDEI-Dipt-0001551 | <i>Psl. zealandica</i> | <i>zealandica</i> clade | NZAC (NZAC02029003) | South Island | Fiordland National Park | -44.699/168.108          | OQ573647                  | OQ598632 | -   | H    |
| SDEI-Dipt-0001552 | <i>Psl. zealandica</i> | <i>zealandica</i> clade | SDEI                | South Island | Fiordland National Park | -44.699/168.108          | OQ573648                  | OQ598633 | -   | H    |
| SDEI-Dipt-0001553 | <i>Psl. zealandica</i> | <i>zealandica</i> clade | SDEI                | South Island | Fiordland National Park | -44.699/168.108          | OQ573649                  | OQ598634 | -   | *B/H |
| SDEI-Dipt-0001554 | <i>Psl. zealandica</i> | <i>zealandica</i> clade | NZAC (NZAC02029004) | South Island | Fiordland National Park | -44.699/168.108          | OQ573650                  | OQ598635 | -   | H    |
| SDEI-Dipt-0001555 | <i>Psl. zealandica</i> | <i>zealandica</i> clade | SDEI                | South Island | Fiordland National Park | -44.699/168.108          | OQ573651                  | OQ598636 | -   | H    |
| SDEI-Dipt-0001556 | <i>Psl. zealandica</i> | <i>zealandica</i> clade | SDEI                | South Island | Fiordland National Park | -44.699/168.108          | OQ573652                  | OQ598637 | -   | H    |
| SDEI-Dipt-0001557 | <i>Psl. zealandica</i> | <i>zealandica</i> clade | NZAC (NZAC02029001) | South Island | Fiordland National Park | -44.699/168.108          | OQ573653                  | OQ598638 | -   | H    |

| Specimen number   | Species                | Taxonomic assignment    | Voucher deposition  | Island       | Locality                | Coordinates (lat./long.) | GenBank accession numbers |          |     |   |
|-------------------|------------------------|-------------------------|---------------------|--------------|-------------------------|--------------------------|---------------------------|----------|-----|---|
|                   |                        |                         |                     |              |                         |                          | COI                       | 16S      | 28S |   |
| SDEI-Dipt-0001558 | <i>Psl. zealandica</i> | <i>zealandica</i> clade | SDEI                | South Island | Fiordland National Park | -44.699/168.108          | OQ573654                  | OQ598639 | -   | H |
| SDEI-Dipt-0001559 | <i>Psl. zealandica</i> | <i>zealandica</i> clade | NZAC (NZAC02029002) | South Island | Fiordland National Park | -44.699/168.108          | OQ573655                  | -        | -   | H |
| SDEI-Dipt-0001664 | <i>Psl. zealandica</i> | <i>zealandica</i> clade | SDEI                | North Island | Tongariro National Park | -39.393/175.450          | OQ573674                  | OQ641748 | -   | H |
| SDEI-Dipt-0001669 | <i>Psl. zealandica</i> | <i>zealandica</i> clade | SDEI                | North Island | Tongariro National Park | -39.393/175.450          | OQ573676                  | OQ641751 | -   | H |
| SDEI-Dipt-0001673 | <i>Psl. zealandica</i> | <i>zealandica</i> clade | SDEI                | North Island | Tongariro National Park | -39.393/175.450          | OQ573677                  | OQ641753 | -   | H |

**Table S2.** Time estimates and probability values for the MRCA distribution for each node of Figure 4. Time estimates are rounded to the nearest of 10 ka. Colours of column headers correspond with the pie charts in Figure 4 (NI, North Island; nSI, northern South Island; sSI, southern South Island; TAS, Tasmania).

[illegible]

**Table S3.** Time estimates and probability values for the MRCA distribution for each node of Figure 5. Time estimates are rounded to the nearest of 10 ka. Colours of column headers correspond with the pie charts in Figure 5 (NI, North Island; nSI, northern South Island; sSI, southern South Island).

| Node label | Taxonomic assignment    | Mean [Ma] | 95% HPD-interval [Ma] | MRCA distribution |       |       |         |        |                |        |               |
|------------|-------------------------|-----------|-----------------------|-------------------|-------|-------|---------|--------|----------------|--------|---------------|
|            |                         |           |                       | NI                | ISu   | ISs   | ISs-ISI | ISs-NI | ISs-ISI-ISs-NI | ISs-NI | unclear state |
| 18         | N. N.                   | 9.945     | 7.452–12.375          | 51.8%             | -     | -     | -       | 30.0%  | 9.4%           | -      | 8.9%          |
| 19         | <i>zealandica</i> clade | 4.950     | 3.641–6.352           | 20.4%             | -     | -     | -       | 72.8%  | -              | -      | 6.8%          |
| 20         | <i>zealandica</i> clade | 3.722     | 2.364–5.095           | 92.9%             | -     | -     | -       | -      | -              | -      | 7.1%          |
| 21         | <i>zealandica</i> clade | 0.352     | 0.132–0.563           | 92.8%             | -     | -     | -       | -      | -              | -      | 7.2%          |
| 22         | <i>zealandica</i> clade | 0.111     | 0.009–0.225           | -                 | -     | -     | 93.7%   | -      | -              | -      | 6.3%          |
| 23         | N. N.                   | 8.895     | 7.127–10.792          | 67.8%             | -     | -     | -       | 16.9%  | 7.8%           | -      | 7.5%          |
| 24         | <i>bispina</i> clade    | 7.897     | 6.020–9.622           | 87.3%             | -     | -     | -       | -      | -              | -      | 12.7%         |
| 25         | <i>bispina</i> clade    | 5.630     | 4.239–6.884           | 79.8%             | -     | -     | -       | 10.8%  | -              | -      | 9.3%          |
| 26         | <i>bispina</i> clade    | 4.306     | 3.033–5.692           | 71.9%             | -     | -     | -       | 16.5%  | 5.4%           | -      | 6.3%          |
| 27         | <i>bispina</i> clade    | 2.212     | 1.396–3.023           | -                 | -     | -     | -       | 41.0%  | 49.3%          | -      | 9.7%          |
| 28         | <i>bispina</i> clade    | 0.558     | 0.211–0.891           | 93.9%             | -     | -     | -       | -      | -              | -      | 6.1%          |
| 29         | <i>bispina</i> clade    | 0.218     | 0.026–0.398           | 93.7%             | -     | -     | -       | -      | -              | -      | 6.3%          |
| 30         | <i>bispina</i> clade    | 2.638     | 1.047–3.830           | 93.9%             | -     | -     | -       | -      | -              | -      | 6.1%          |
| 31         | <i>bispina</i> clade    | 0.541     | 0.160–0.916           | 93.8%             | -     | -     | -       | -      | -              | -      | 6.2%          |
| 32         | <i>bispina</i> clade    | 1.235     | 0.515–1.999           | -                 | -     | -     | -       | 93.5%  | -              | -      | 6.5%          |
| 33         | <i>jejuna</i> clade     | 6.093     | 4.918–7.413           | 29.0%             | -     | -     | -       | 22.8%  | 41.9%          | -      | 6.3%          |
| 34         | <i>jejuna</i> clade     | 4.447     | 3.280–5.618           | 93.7%             | -     | -     | -       | -      | -              | -      | 6.3%          |
| 35         | <i>jejuna</i> clade     | 2.718     | 1.992–3.610           | 93.7%             | -     | -     | -       | -      | -              | -      | 6.3%          |
| 36         | <i>jejuna</i> clade     | 1.725     | 1.017–2.465           | 85.7%             | -     | -     | -       | 8.1%   | -              | -      | 6.2%          |
| 37         | <i>jejuna</i> clade     | 5.554     | 4.401–6.674           | 15.4%             | -     | -     | 16.2%   | 15.0%  | 43.0%          | -      | 10.4%         |
| 38         | <i>jejuna</i> clade     | 4.557     | 3.480–5.625           | -                 | -     | 35.6% | 17.2%   | -      | 40.7%          | -      | 6.5%          |
| 39         | <i>jejuna</i> clade     | 3.460     | 2.453–4.377           | -                 | -     | 23.9% | 18.2%   | -      | 51.8%          | -      | 6.1%          |
| 40         | <i>jejuna</i> clade     | 1.942     | 1.298–2.687           | -                 | -     | -     | -       | 19.3%  | 74.6%          | -      | 6.1%          |
| 41         | <i>jejuna</i> clade     | 0.802     | 0.357–1.162           | -                 | 13.4% | -     | 80.3%   | -      | -              | -      | 6.3%          |

| MRCA distribution |                      |           |                       |       |     |       |         |        |            |        |               |
|-------------------|----------------------|-----------|-----------------------|-------|-----|-------|---------|--------|------------|--------|---------------|
| Node label        | Taxonomic assignment | Mean [Ma] | 95% HPD-interval [Ma] | IN    | ISI | ISI   | ISI-ISI | NI-nSI | NI-nSI-ISI | NI-sSI | unclear state |
| 42                | <i>jejuna</i> clade  | 0.397     | 0.112–0.663           | -     | -   | -     | 94.7%   | -      | -          | -      | 5.3%          |
| 43                | <i>jejuna</i> clade  | 2.914     | 1.629–3.932           | 14.4% | -   | -     | -       | 20.2%  | 59.3%      | -      | 6.1%          |
| 44                | <i>jejuna</i> clade  | 1.459     | 0.669–2.162           | -     | -   | -     | 5.5%    | -      | 88.2%      | -      | 6.3%          |
| 45                | <i>jejuna</i> clade  | 0.215     | 0.075–0.369           | -     | -   | 93.7% | -       | -      | -          | -      | 6.3%          |
| 46                | <i>jejuna</i> clade  | 0.134     | 0.003–0.266           | -     | -   | 80.0% | 11.5%   | -      | -          | -      | 8.5%          |
